# Supplementary material for: Measurement report: An investigation of the spatiotemporal variability in aerosols in the mountainous terrain of the upper Colorado River basin using SAIL-Net
Source: Copernicus journal article supplement (doi:10.5194/acp-25-2745-2025), 2025-03-03
Supplement: Supplementary file 1 [file acp-25-2745-2025-supplement.pdf]

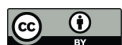

*Supplement of*

**Measurement report: An investigation of the spatiotemporal variability in aerosols in the mountainous terrain of the upper Colorado River basin using SAIL-Net**

**Leah D. Gibson et al.**

*Correspondence to:* Leah D. Gibson ([lgibson@handixscientific.com](mailto:lgibson@handixscientific.com))

The copyright of individual parts of the supplement might differ from the article licence.

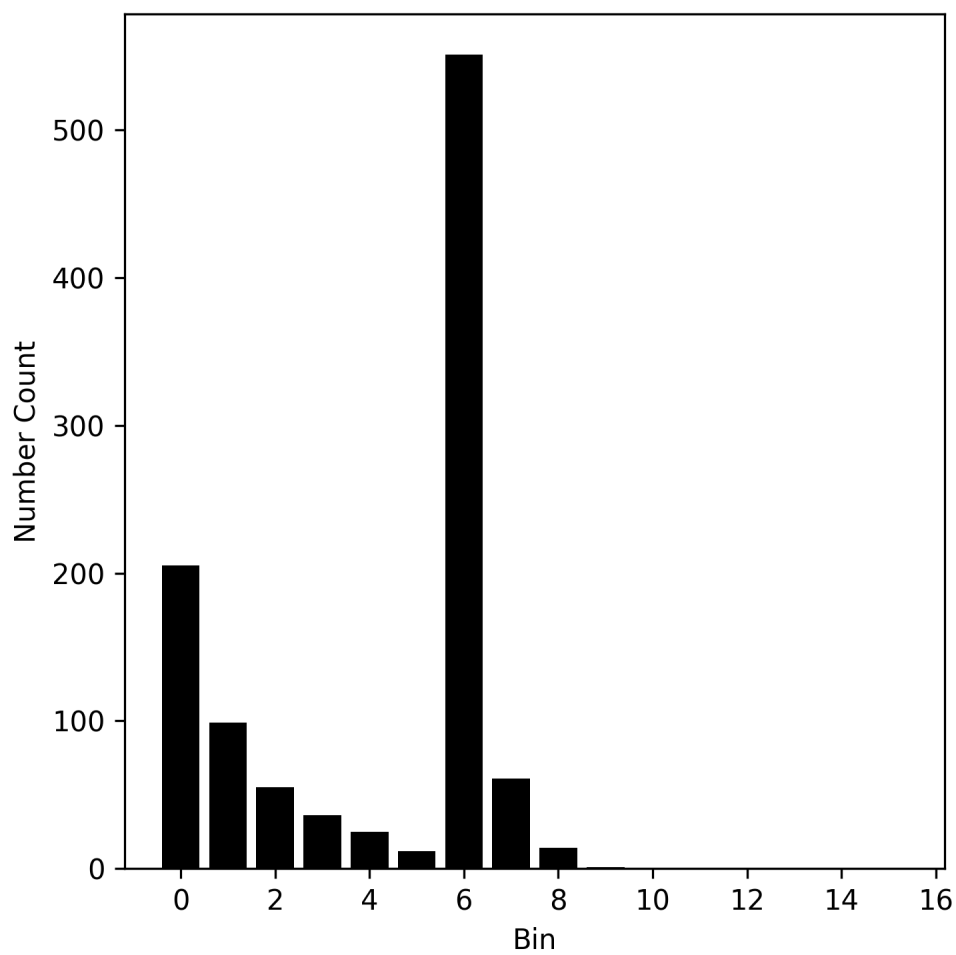

Figure S1: An example of number counts during a PSL check. The signal from the 495 nm PSL should be binned into bin 8. Here, the peak occurs in bin 6, indicating that the POPS had experienced enough drift for the 495 nm PSL to be binned into bin 6, as seen by the high number count in bin 6.

| Month      | Pumphouse | Gothic | Irwin | CBMid | Snodgrass | CBTop |
|------------|-----------|--------|-------|-------|-----------|-------|
| 2021 Oct.  | 8         | 8      |       | 8     | 8         |       |
| 2021 Nov.  | 8         | 8      | 8     | 8     | 8         |       |
| 2021 Dec.  | 8         | 8      | 8     | 8     | 8         |       |
| 2022 Jan.  | 8         | 8      | 7     | 8     | 8         |       |
| 2022 Feb.  | 8         | 8      | 7     | 8     | 8         |       |
| 2022 March | 8         | 8      | 7     | 8     | 8         |       |
| 2022 April | 8         | 7      | 7     | 7     | 8         |       |
| 2022 May   | 7         | 7      | 7     | 7     | 8         |       |
| 2022 June  | 7         | 7      | 7     | 7     | 8         | 8     |
| 2022 July  | 7         | 7      | 7     | 7     | 8         | 8     |
| 2022 Aug.  | 7         | 7      | 7     | 7     | 8         | 8     |
| 2022 Sept. | 7         | 7      | 7     | 7     | 8         | 8     |
| 2022 Oct.  | 7         | 6      | 7     | 8     | 8         | 8     |
| 2022 Nov.  | 7         | 6      | 7     | 8     | 8         | 8     |
| 2022 Dec.  | 7         | 6      | 7     | 8     | 8         | 8     |
| 2023 Jan.  | 7         | 6      | 7     | 8     | 8         | 8     |
| 2023 Feb.  | 7         | 6      | 7     | 8     | 8         | 8     |
| 2023 March | 6         | 8      | 7     | 8     | 8         | 8     |
| 2023 April | 6         | 8      | 7     | 8     | 8         | 8     |
| 2023 May   | 6         | 8      | 7     | 8     | 8         | 8     |
| 2023 June  | 5         | 8      | 7     | 8     | 8         | 8     |
| 2023 July  | 4         | 8      | 7     |       | 8         | 8     |

Table S1: The number (from 0 to 15) corresponding to the bin where the signal from the 495 nm PSL was observed during PSL checks, or the interpolation if there was not a check for a given month. When the POPS is sizing accurately, PSL should be in bin 8. The POPS at Gothic and CBMid were replaced in 2023 March and 2022 Oct., respectively, which caused the subsequent PSL checks to be binned correctly into bin 8. If the PSL signal did not occur in bin 8, the data for that month were post-corrected using the method explained in Section 2.2 of the manuscript.
